# Supplementary material for: Salmonella enterica Infections Are Disrupted by Two Small Molecules That Accumulate within Phagosomes and Differentially Damage Bacterial Inner Membranes
Source: mBio. 2022 Sep 22;13(5):e01790-22. doi: 10.1128/mbio.01790-22 (PMC9601186; doi:10.1128/mbio.01790-22)
Supplement: FIG S4 [file mbio.01790-22-s0004.pdf]

### JAV1

**A** Phosphatidylethanolamine

| MIC  | μM   | 0 | 0.4 | 0.7 | 1.5 | 3.7 | 7.5 | 18.7 | 37.3 | 74.7 | 112.0 | μg/mL | Charge     | Log P (Lipophilicity) |
|------|------|---|-----|-----|-----|-----|-----|------|------|------|-------|-------|------------|-----------------------|
| 4x   | 200  | 0 | 0.5 | 1   | 2   | 5   | 10  | 25   | 50   | 100  | 150   | μg/mL | Zwitterion | 9.2                   |
| 3x   | 150  |   |     |     |     |     |     |      |      |      |       |       |            |                       |
| 2x   | 100  |   |     |     |     |     |     |      |      |      |       |       |            |                       |
| 1.5x | 75   |   |     |     |     |     |     |      |      |      |       |       |            |                       |
| 1x   | 50   |   |     |     |     |     |     |      |      |      |       |       |            |                       |
| DMSO | DMSO |   |     |     |     |     |     |      |      |      |       |       |            |                       |

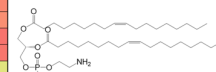

### JAV2

**A** Phosphatidylethanolamine

| MIC  | μM   | 0 | 0.4 | 0.7 | 1.5 | 3.7 | 7.5 | 18.7 | 37.3 | 74.7 | 112.0 | μg/mL | Charge     | Log P (Lipophilicity) |
|------|------|---|-----|-----|-----|-----|-----|------|------|------|-------|-------|------------|-----------------------|
| 4x   | 200  | 0 | 0.5 | 1   | 2   | 5   | 10  | 25   | 50   | 100  | 150   | μg/mL | Zwitterion | 9.2                   |
| 3x   | 150  |   |     |     |     |     |     |      |      |      |       |       |            |                       |
| 2x   | 100  |   |     |     |     |     |     |      |      |      |       |       |            |                       |
| 1.5x | 75   |   |     |     |     |     |     |      |      |      |       |       |            |                       |
| 1x   | 50   |   |     |     |     |     |     |      |      |      |       |       |            |                       |
| DMSO | DMSO |   |     |     |     |     |     |      |      |      |       |       |            |                       |

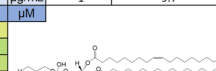

### JAV1

**B** Phosphatidylglycerol

| MIC  | μM   | 0 | 0.2 | 0.5 | 1.0 | 2.5 | 5.0 | 12.4 | 24.8 | 49.6 | 74.3 | μg/mL | Charge | Log P (Lipophilicity) |
|------|------|---|-----|-----|-----|-----|-----|------|------|------|------|-------|--------|-----------------------|
| 4x   | 200  | 0 | 0.5 | 1   | 2   | 5   | 10  | 25   | 50   | 100  | 150  | μg/mL | -1     | 9.7                   |
| 3x   | 150  |   |     |     |     |     |     |      |      |      |      |       |        |                       |
| 2x   | 100  |   |     |     |     |     |     |      |      |      |      |       |        |                       |
| 1.5x | 75   |   |     |     |     |     |     |      |      |      |      |       |        |                       |
| 1x   | 50   |   |     |     |     |     |     |      |      |      |      |       |        |                       |
| DMSO | DMSO |   |     |     |     |     |     |      |      |      |      |       |        |                       |

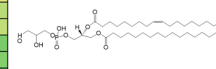

### JAV2

**B** Phosphatidylglycerol

| MIC  | μM   | 0 | 0.2 | 0.5 | 1.0 | 2.5 | 5.0 | 12.4 | 24.8 | 49.6 | 74.3 | μg/mL | Charge | Log P (Lipophilicity) |
|------|------|---|-----|-----|-----|-----|-----|------|------|------|------|-------|--------|-----------------------|
| 4x   | 200  | 0 | 0.5 | 1   | 2   | 5   | 10  | 25   | 50   | 100  | 150  | μg/mL | -1     | 9.7                   |
| 3x   | 150  |   |     |     |     |     |     |      |      |      |      |       |        |                       |
| 2x   | 100  |   |     |     |     |     |     |      |      |      |      |       |        |                       |
| 1.5x | 75   |   |     |     |     |     |     |      |      |      |      |       |        |                       |
| 1x   | 50   |   |     |     |     |     |     |      |      |      |      |       |        |                       |
| DMSO | DMSO |   |     |     |     |     |     |      |      |      |      |       |        |                       |

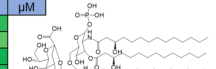

### JAV1

**C** Kdo<sub>2</sub>-Lipid A

| MIC  | μM   | 0 | 1.2 | 2.3 | 4.6 | 11.5 | 23.1 | 57.7 | 115.3 | 231.0 | 346.0 | μg/mL | Charge | Log P (Lipophilicity) |
|------|------|---|-----|-----|-----|------|------|------|-------|-------|-------|-------|--------|-----------------------|
| 4x   | 200  | 0 | 0.5 | 1   | 2   | 5    | 10   | 25   | 50    | 100   | 150   | μg/mL | -2     | 10.7                  |
| 3x   | 150  |   |     |     |     |      |      |      |       |       |       |       |        |                       |
| 2x   | 100  |   |     |     |     |      |      |      |       |       |       |       |        |                       |
| 1.5x | 75   |   |     |     |     |      |      |      |       |       |       |       |        |                       |
| 1x   | 50   |   |     |     |     |      |      |      |       |       |       |       |        |                       |
| DMSO | DMSO |   |     |     |     |      |      |      |       |       |       |       |        |                       |

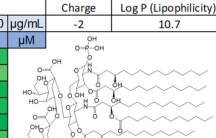

### JAV2

**C** Kdo<sub>2</sub>-Lipid A

| MIC | μM  | 0 | 1.2 | 2.3 | 4.6 | 11.5 | 23.1 | 57.7 | 115.3 | 231.0 | 346.0 | μg/mL | Charge | Log P (Lipophilicity) |
|-----|-----|---|-----|-----|-----|------|------|------|-------|-------|-------|-------|--------|-----------------------|
| 4x  | 200 | 0 |     |     |     |      |      |      |       |       |       |       |        |                       |
