# Supplementary material for: Salmonella enterica Infections Are Disrupted by Two Small Molecules That Accumulate within Phagosomes and Differentially Damage Bacterial Inner Membranes
Source: PubMed Central journal article supplement (PMC9601186; doi:10.1128/mbio.01790-22), 2022-09-22
Supplement: mbio.01790-22-s0008.pdf [file mbio.01790-22-s0008.pdf]

**Figure S8**

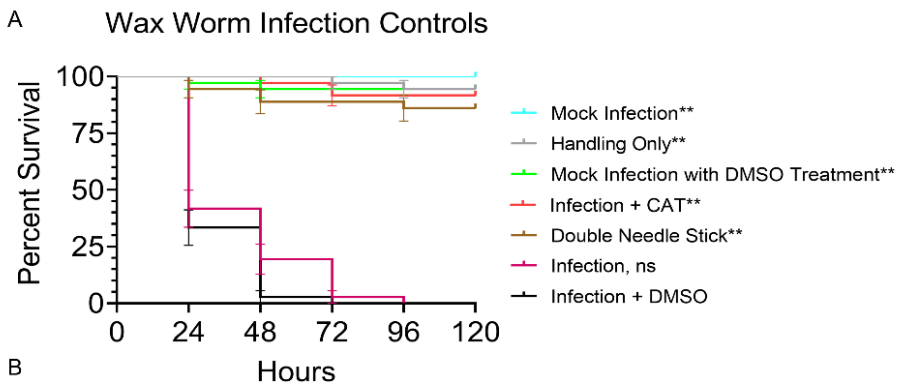

**B**

| mg/kg | JAV1<br>[ $\mu$ M] | JAV2<br>[ $\mu$ M] | Chloramphenicol<br>(CAT) [ $\mu$ M] |
|-------|--------------------|--------------------|-------------------------------------|
| 30    | 128                | 116                |                                     |
| 25    |                    |                    | 119                                 |
| 20    | 85                 | 78                 |                                     |
| 10    | 43                 | 39                 |                                     |
| 5     | 21                 | 19                 |                                     |
