# Supplementary material for: Salmonella enterica Infections Are Disrupted by Two Small Molecules That Accumulate within Phagosomes and Differentially Damage Bacterial Inner Membranes
Source: PubMed Central journal article supplement (PMC9601186; doi:10.1128/mbio.01790-22), 2022-09-22

**Figure S9**

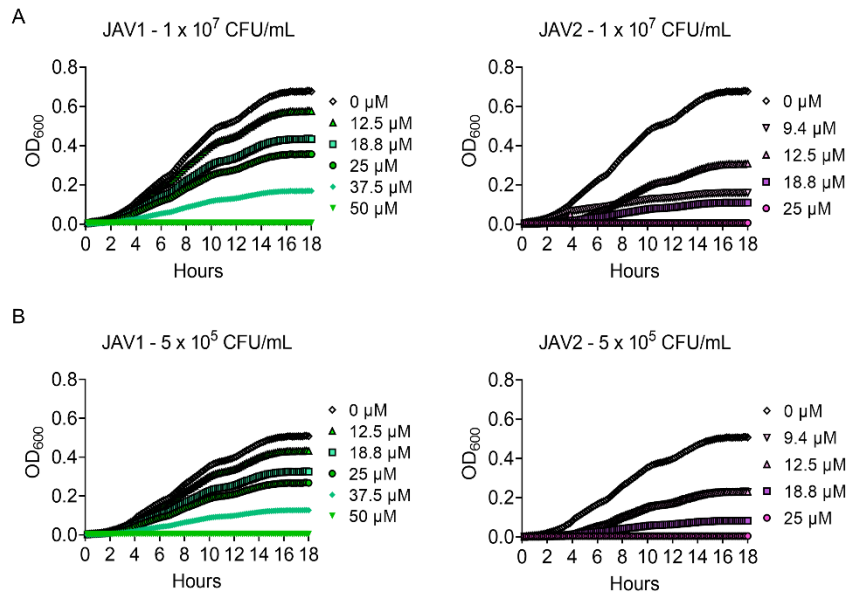

Supplement: mbio.01790-22-s0009.pdf [file mbio.01790-22-s0009.pdf]
